# Supplementary material
Source: MDPI journal article supplement (https://www.mdpi.com/2073-4344/12/10/1119)
Supplement: s1 [file s1]

## Supporting Information

# 2-(Arylimino)benzylidene-8-arylimino-5,6,7-trihydroquinoline Cobalt(II) Dichloride Polymerization Catalysts for Polyethylenes with Narrow Polydispersity

Zheng Zuo<sup>1</sup>, Qiuyue Zhang<sup>1,2</sup>, Mingyang Han<sup>1,2</sup>, Ming Liu<sup>1,2</sup>, Yang Sun<sup>1</sup>, Yanping Ma<sup>1</sup> and Wen-Hua Sun<sup>1,2,\*</sup>

<sup>1</sup> Key Laboratory of Engineering Plastics and Beijing National Laboratory for Molecular Sciences, Institute of Chemistry Chinese Academy of Sciences, Beijing 100190, China

<sup>2</sup> CAS Research/Education Center for Excellence in Molecular Sciences and International School, University of Chinese Academy of Sciences, Beijing 100049, China

\* Correspondence: e-mail@whsun@iccas.ac.cn; Tel.: +86-10-6255-7955

|     | Table of contents                                                                                                                                                                                                                                                         | Page |
|-----|---------------------------------------------------------------------------------------------------------------------------------------------------------------------------------------------------------------------------------------------------------------------------|------|
| 1.  | <b>Table S1.</b> Crystal data and structure refinements for <b>Co2</b> and <b>Co5</b>                                                                                                                                                                                     | S2   |
| 2.  | <b>Figure S1.</b> For <b>Co6/MMAO</b> : (a) GPC traces of the polyethylene obtained at different run temperatures and (b) plots of catalytic activity and $M_w$ of the resultant PE as a function of reaction temperature (entries 1 – 4, Table 4)                        | S3   |
| 3.  | <b>Figure S2.</b> For <b>Co6/MMAO</b> : (a) GPC traces of the polymers obtained at different Al:Co molar ratios and (b) plots of catalytic activity and $M_w$ of the resultant PE as a function of Al:Co molar ratio (entries 2, 5 – 8, Table 4)                          | S3   |
| 4.  | <b>Figure S3.</b> For <b>Co6/MMAO</b> : (a) GPC traces of the polyethylene obtained over the course of time and (b) plots of catalytic activity and $M_w$ of the resultant PE as a function of reaction time (entries 5, 9 – 12, Table 4)                                 | S3   |
| 5.  | <b>Figure S4.</b> Catalytic activities and molecular weight of the polyethylenes produced by <b>Co1</b> – <b>Co6</b> ; MMAO as co-catalyst in each case (entries 1 – 6, Table 5)                                                                                          | S4   |
| 6.  | <b>Figure S5.</b> <sup>1</sup> H NMR spectrum of the polyethylene obtained using <b>Co2/MMAO</b> at 40 °C (entry 2, Table 5) along with an inset of the <sup>13</sup> C NMR spectrum; both spectra recorded at 100 °C in 1,1,2,2-tetrachloroethane- <i>d</i> <sub>2</sub> | S4   |
| 7.  | <b>Figure S6.</b> DEPT-135 <sup>13</sup> C NMR spectrum of the polyethylene obtained using <b>Co2/MAO</b> at 50 °C (entry 2, Table 3)                                                                                                                                     | S5   |
| 8.  | <b>Figure S7.</b> DEPT-135 <sup>13</sup> C NMR spectrum of the polyethylene obtained using <b>Co2/MMAO</b> at 40 °C (entry 2, Table 5)                                                                                                                                    | S5   |
| 9.  | <b>Figure S8.</b> FT-IR spectra of the polyethylene samples generated using <b>Co2/MAO</b> (top, entry 2, Table 3) and <b>Co6/MAO</b> (middle, entry 2, Table 2 and bottom, entry 8, Table 2)                                                                             | S6   |
| 10. | <b>Figure S9.</b> FT-IR spectra of the polyethylene generated using <b>Co2/MMAO</b> (top, entry 2, Table 5) and <b>Co6/MMAO</b> (middle, entry 5, Table 4 and bottom, entry 7, Table 4)                                                                                   | S6   |

**Table S1.** Crystal data and structure refinement for **Co2** and **Co5**.

|                                                              | <b>Co2</b>                                                       | <b>Co5</b>                                                                       |
|--------------------------------------------------------------|------------------------------------------------------------------|----------------------------------------------------------------------------------|
| CCDC number                                                  | 2160864                                                          | 2160865                                                                          |
| Empirical formula                                            | C <sub>58</sub> H <sub>51</sub> Cl <sub>2</sub> CoN <sub>3</sub> | C <sub>172</sub> H <sub>150</sub> Cl <sub>4</sub> Co <sub>2</sub> N <sub>6</sub> |
| Formula weight                                               | 919.84                                                           | 2560.63                                                                          |
| T (K)                                                        | 169.99(13)                                                       | 169.99(13)                                                                       |
| Wavelength (Å)                                               | 1.54184                                                          | 1.54184                                                                          |
| Crystal system                                               | orthorhombic                                                     | monoclinic                                                                       |
| Space group                                                  | Pbca                                                             | P2 <sub>1</sub> /c                                                               |
| <i>a</i> /Å                                                  | 10.1343(3)                                                       | 13.6880(2)                                                                       |
| <i>b</i> /Å                                                  | 16.8486(6)                                                       | 20.8927(2)                                                                       |
| <i>c</i> /Å                                                  | 59.062(2)                                                        | 52.9277(7)                                                                       |
| $\alpha$ /°                                                  | 90                                                               | 90                                                                               |
| $\beta$ /°                                                   | 90                                                               | 93.9140(10)                                                                      |
| $\gamma$ /°                                                  | 90                                                               | 90                                                                               |
| Volume/Å <sup>3</sup>                                        | 10084.8(6)                                                       | 15100.9(3)                                                                       |
| Z                                                            | 8                                                                | 4                                                                                |
| $\rho_{\text{calc}}$ /cm <sup>3</sup>                        | 1.212                                                            | 1.126                                                                            |
| $\mu$ /mm <sup>-1</sup>                                      | 3.938                                                            | 2.764                                                                            |
| F(000)                                                       | 3848.0                                                           | 5384.0                                                                           |
| Crystal size/mm <sup>3</sup>                                 | 0.24 × 0.18 × 0.13                                               | 0.12 × 0.08 × 0.03                                                               |
| 2 $\Theta$ range for data collection (°)                     | 5.986 to 151.124                                                 | 4.548 to 151.076                                                                 |
|                                                              | -12 ≤ <i>h</i> ≤ 12                                              | -17 ≤ <i>h</i> ≤ 16                                                              |
| Index ranges                                                 | -21 ≤ <i>l</i> ≤ 19                                              | -23 ≤ <i>k</i> ≤ 26                                                              |
|                                                              | -73 ≤ <i>l</i> ≤ 74                                              | -66 ≤ <i>l</i> ≤ 65                                                              |
| Reflections collected                                        | 74898                                                            | 116664                                                                           |
| Independent reflections [ <i>R</i> <sub>int</sub> ]          | 10140(0.0983)                                                    | 30024(0.0612)                                                                    |
| Completeness to $\theta$ (%)                                 | 99.9                                                             | 99.8                                                                             |
| Goodness of fit on <i>F</i> <sup>2</sup>                     | 1.051                                                            | 1.019                                                                            |
| Final <i>R</i> indexes [ <i>I</i> ≥ 2 $\sigma$ ( <i>I</i> )] | <i>R</i> <sub>1</sub> = 0.1428                                   | <i>R</i> <sub>1</sub> = 0.0636                                                   |
| Final <i>R</i> indexes (all data)                            | <i>wR</i> <sub>2</sub> = 0.4052                                  | <i>wR</i> <sub>2</sub> = 0.1611                                                  |
|                                                              | <i>R</i> <sub>1</sub> = 0.1703                                   | <i>R</i> <sub>1</sub> = 0.0975                                                   |
|                                                              | <i>wR</i> <sub>2</sub> = 0.4257                                  | <i>wR</i> <sub>2</sub> = 0.1812                                                  |
| Largest diff peak/hole (e/Å <sup>-3</sup> )                  | 1.38/-0.65                                                       | 0.85/-0.50                                                                       |

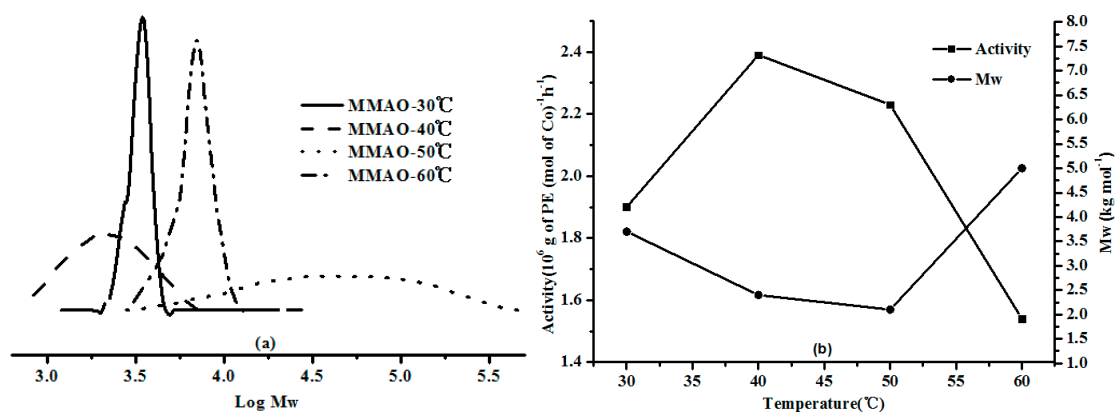

**Figure S1.** For Co6/MMAO: (a) GPC traces of the polyethylene obtained at different run temperatures and (b) activity and  $M_w$  as a function of reaction temperature (entries 1 – 4, Table 4).

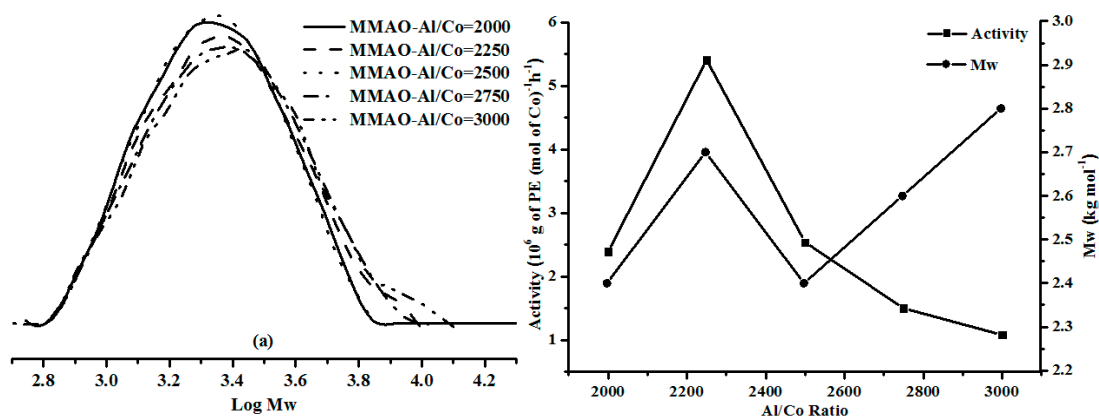

**Figure S2.** For Co6/MMAO: (a) GPC traces of the polymers obtained at different Al:Co molar ratios and (b) catalytic activity and  $M_w$  as a function of Al:Co molar ratio (entries 2, 5 – 8, Table 4).

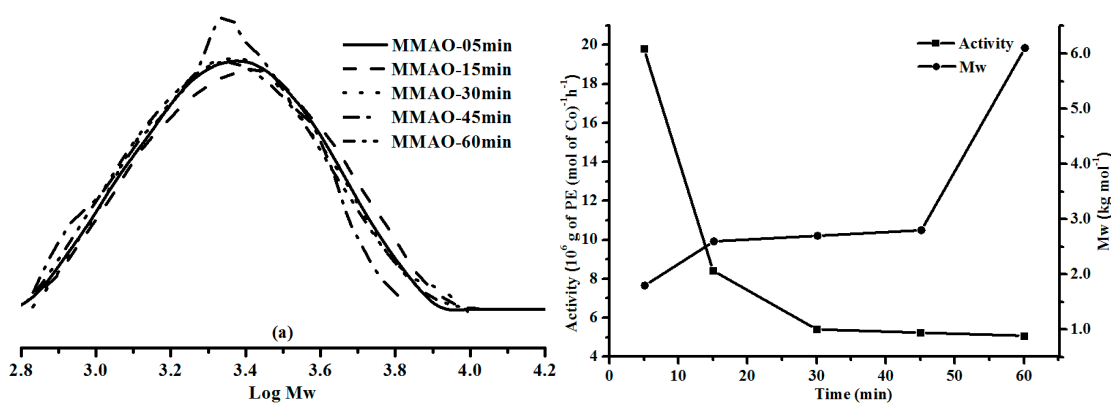

**Figure S3.** For Co6/MMAO: (a) GPC traces of the polyethylene obtained over the course of time and (b) activity and  $M_w$  as a function of reaction time (entries 5, 9 – 12, Table 4).

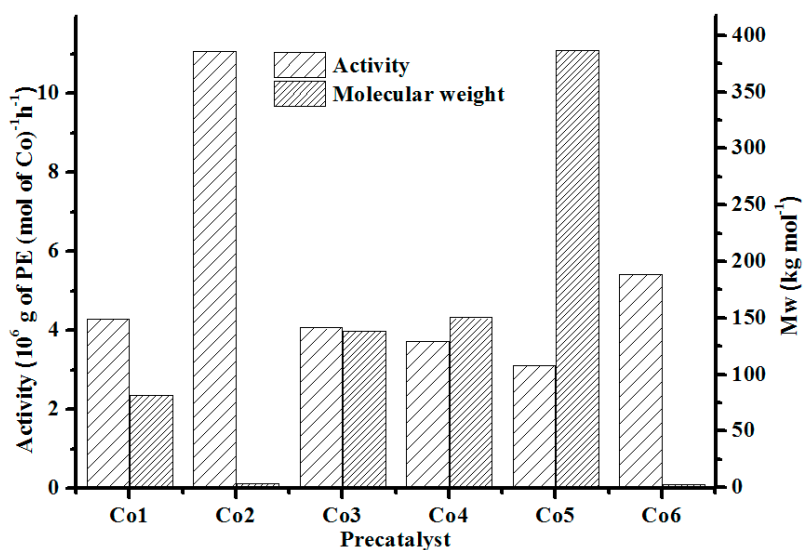

**Figure S4.** Catalytic activities and molecular weight of the polyethylenes produced by Co1 – Co6; MMAO as co-catalyst in each case (entries 1 – 6, Table 5).

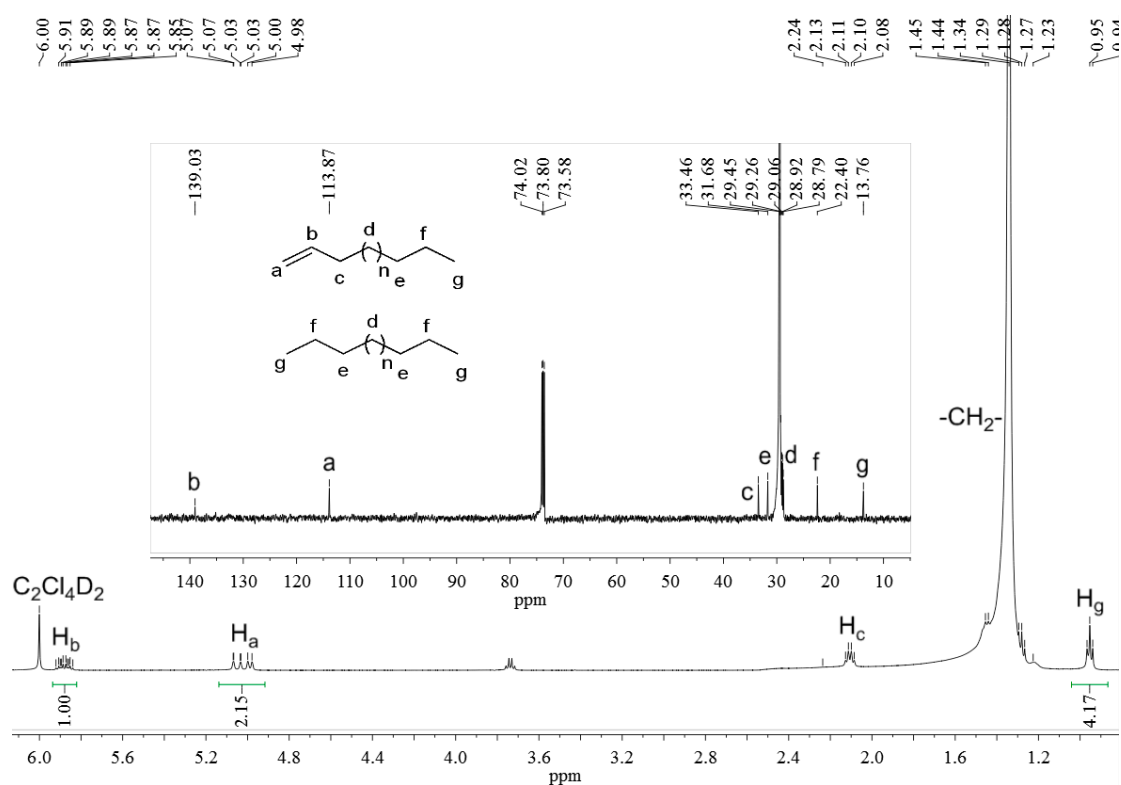

**Figure S5.**  $^1\text{H}$  NMR spectrum of the polyethylene obtained using Co2/MMAO at 40 °C (entry 2, Table 5) along with an inset of the  $^{13}\text{C}$  NMR spectrum; both spectra recorded at 100 °C in 1,1,2,2-tetrachloroethane- $d_2$ .

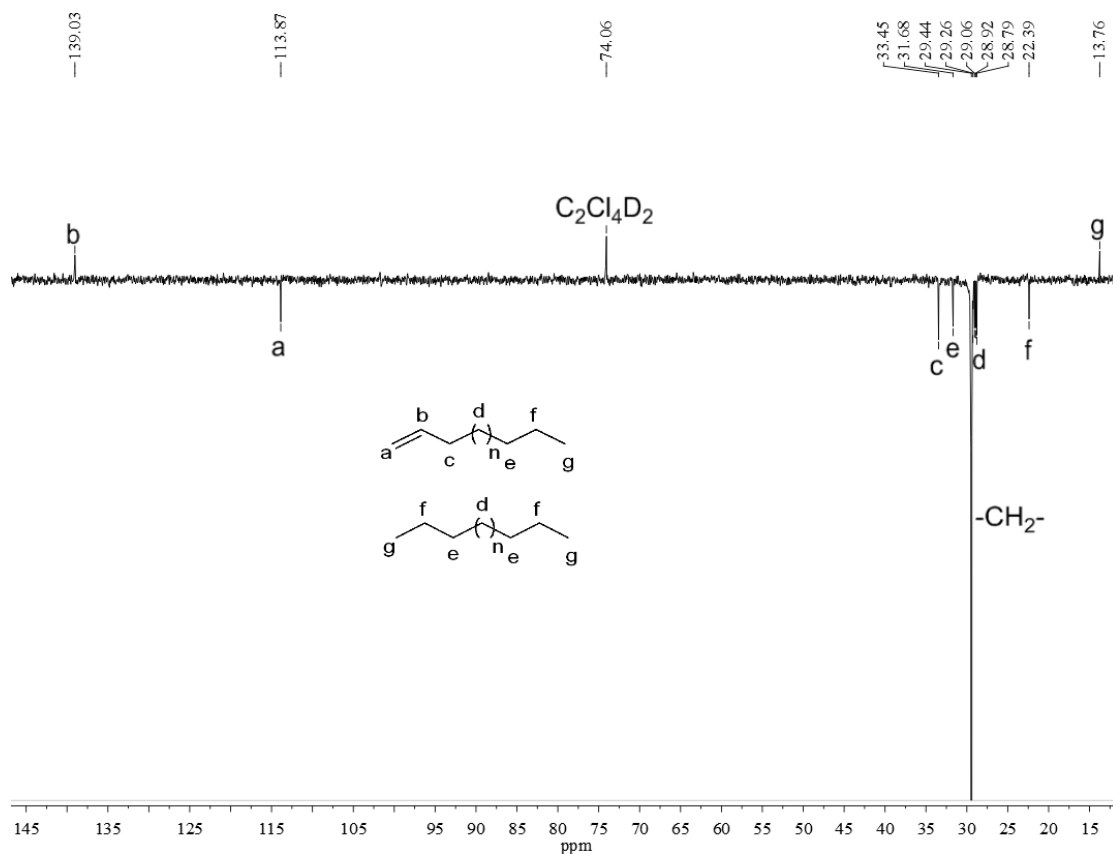

**Figure S6.** DEPT-135  $^{13}\text{C}$  NMR spectrum of the polyethylene obtained using  $\text{Co}_2/\text{MAO}$  at  $50^\circ\text{C}$  (entry 2, Table 3).

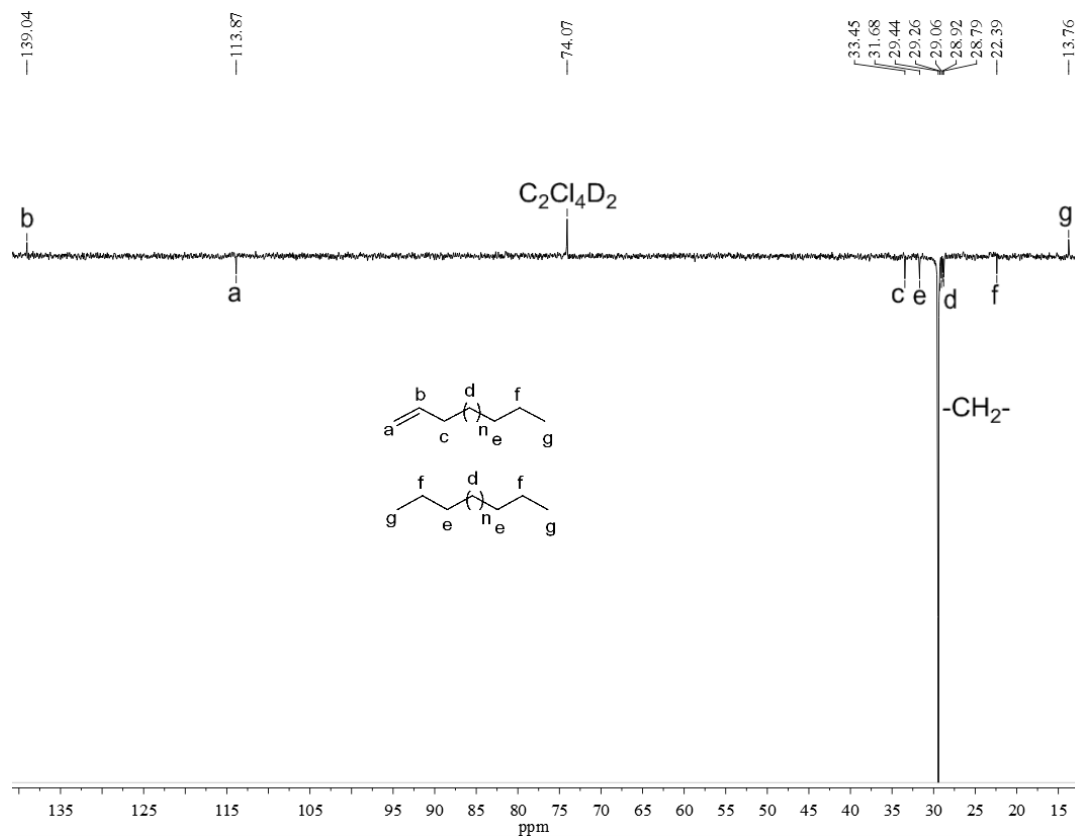

**Figure S7.** DEPT-135  $^{13}\text{C}$  NMR spectrum of the polyethylene obtained using  $\text{Co}_2/\text{MMAO}$  at  $40^\circ\text{C}$  (entry 2, Table 5).

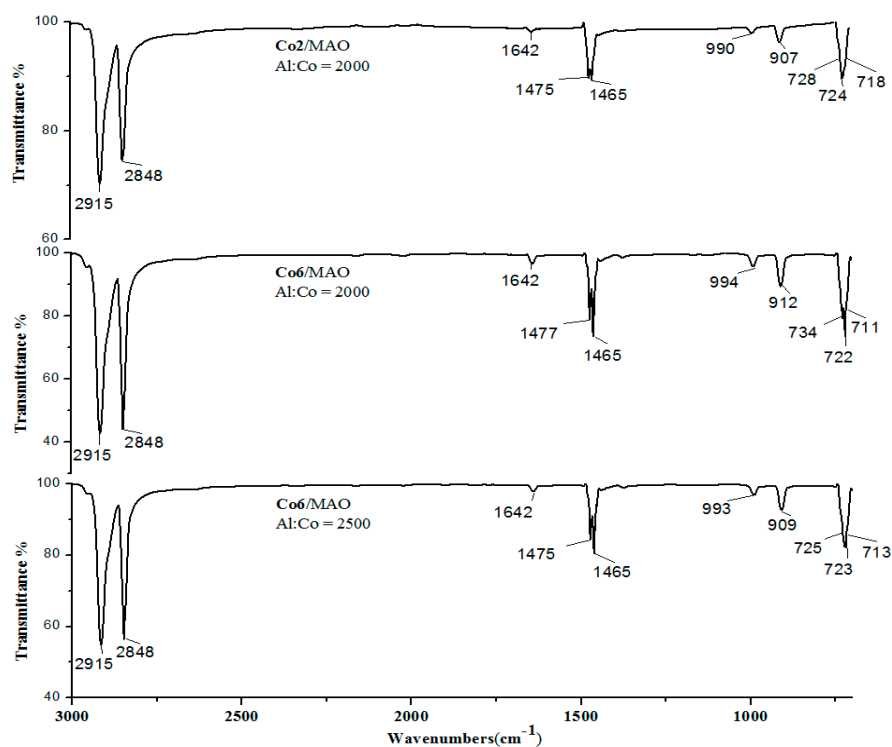

**Figure S8.** FT-IR spectra of the polyethylene samples generated using **Co2/MAO** (top, entry 2, Table 3) and **Co6/MAO** (middle, entry 2, Table 2 and bottom, entry 8, Table 2).

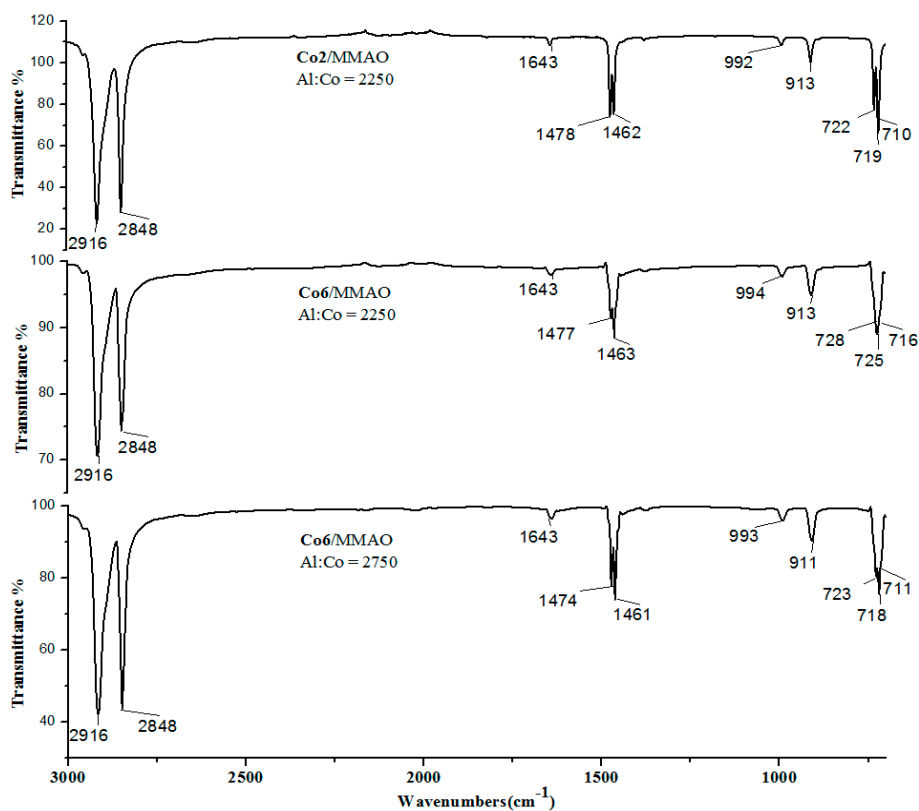

**Figure S9.** FT-IR spectra of the polyethylene generated using **Co2/MMAO** (top, entry 2, Table 5) and **Co6/MMAO** (middle, entry 5, Table 4 and bottom, entry 7, Table 4).
